# Supplementary material for: Mitochondrial AIF loss causes metabolic reprogramming, caspase-independent cell death blockade, embryonic lethality, and perinatal hydrocephalus
Source: PubMed Central journal article supplement — Mol Metab. 2020 May 30;40:101027. doi: 10.1016/j.molmet.2020.101027 (PMC7334469; doi:10.1016/j.molmet.2020.101027), 2020-05-30
Supplement: mmc2.pdf [file mmc2.pdf]

**A**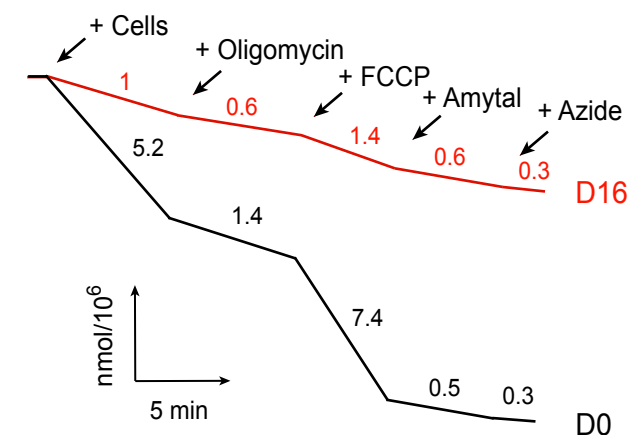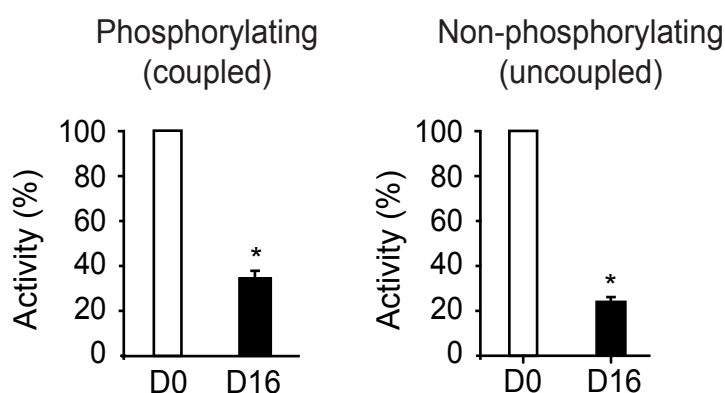**B**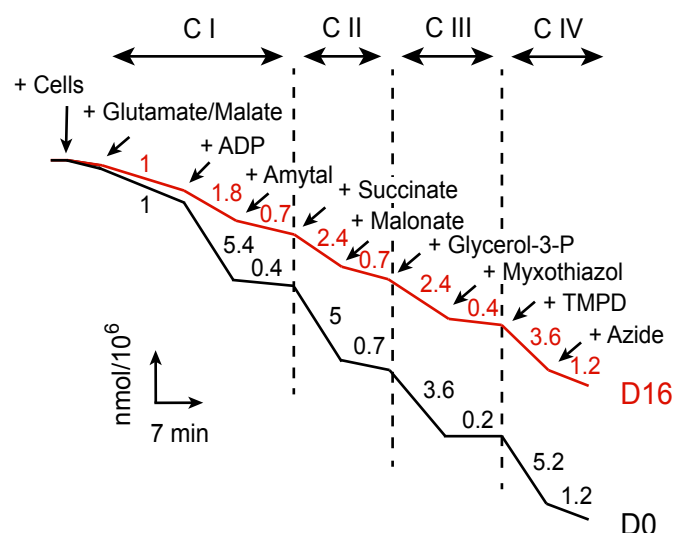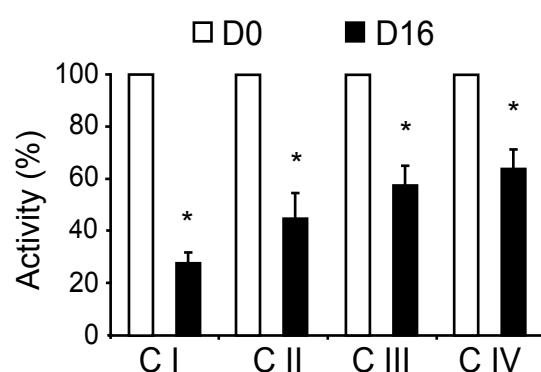

### Supplemental Figure 2. Mitochondrial respiration and cellular ATP generation were altered in the AIF KO MEFs.

(A) Representative recording of basal (coupled) and maximal mitochondrial respiration (uncoupled) assessed in control (D0) and AIF KO MEFs (D16) using a Clark electrode. Basal respiration corresponds to O<sub>2</sub> consumption rate coupled to ATP production, whereas sequential addition of 10  $\mu$ M oligomycin, 15  $\mu$ M fluoro-carbonyl cyanide phenylhydrazone (FCCP), 2 mM amytal, and 5 mM azyde enables calculation of the maximal oxygen consumption rate. The % of activity assessed in D16 cells, relative to D0 MEFs (considered as a 100 %), was expressed as a histogram (n = 5 independent experiments). (B) Representative recording of the activities of mitochondrial ETC complexes I to IV measured, as described in the Methods section, in a Clark's electrode in control (D0) and AIF KO (D16) MEFs. The % of activity of the ETC complexes of the AIF KO cells (D16) relative to control MEFs (D0) (considered as a 100 %), was expressed as a histogram (n = 5 independent experiments). Statistical significance in (A) and (B) was calculated by Mann-Whitney test. Bars represent mean  $\pm$  SEM.
