# Supplementary material for: Mitochondrial AIF loss causes metabolic reprogramming, caspase-independent cell death blockade, embryonic lethality, and perinatal hydrocephalus
Source: PubMed Central journal article supplement — Mol Metab. 2020 May 30;40:101027. doi: 10.1016/j.molmet.2020.101027 (PMC7334469; doi:10.1016/j.molmet.2020.101027), 2020-05-30
Supplement: mmc3.pdf [file mmc3.pdf]

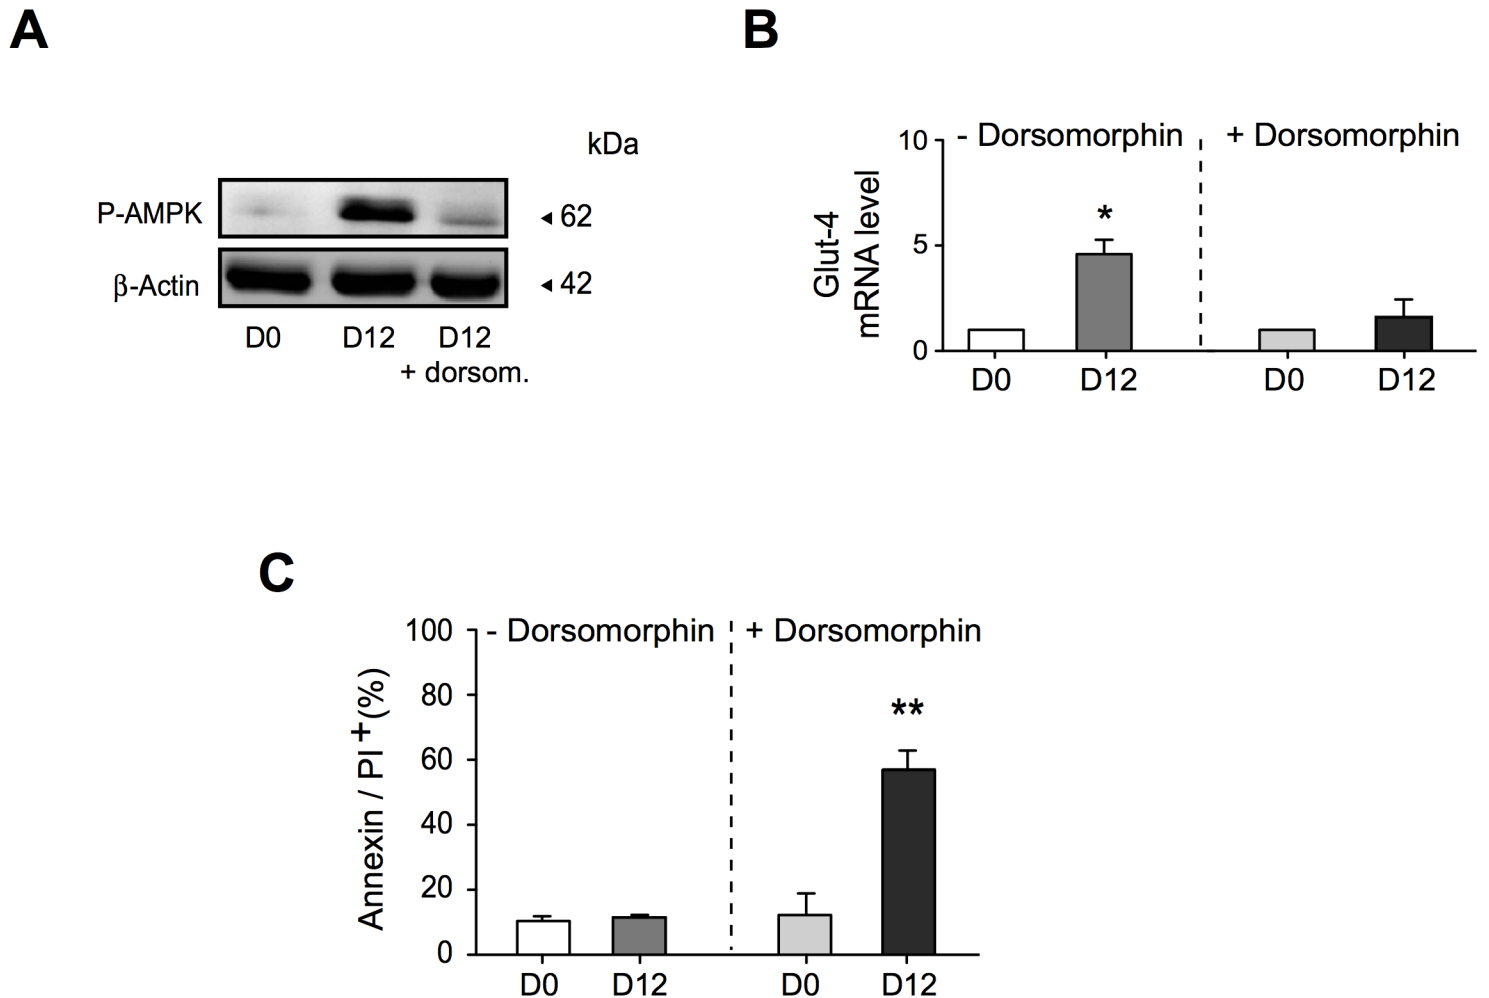

**Supplemental Figure 3. AMPK inhibition precluded Glut-4 mRNA overexpression and provoked cell death in AIF KO MEFs.** (A) phosphorylation of AMPK at Thr172 visualized by immunoblot in control (D0) and AIF- $\gamma$  MEFs (D12 post-tamoxifen) pre-treated or not with dorsomorphin (Compound C; 25  $\mu$ M). Equal loading was confirmed by  $\beta$ -Actin probing. This experiment was repeated three times with similar results. (B) Glut-4 mRNA levels determined by qPCR in control (D0) and AIF- $\gamma$  MEFs (D12 post-tamoxifen) pre-treated or not with dorsomorphin as in (A) ( $n = 7$ ). 18S mRNA expression was used to normalize data. Results are expressed as a ratio of mRNA expression relative to control (D0) cells (set at 1.0). (C) Cytofluorometric assessment of cell death performed in control (D0) and AIF- $\gamma$  MEFs (D12 post-tamoxifen) pre-treated or not with dorsomorphin as above and labeled with AnnexinV and PI. The frequency of positive staining, which represents dying cells, was recorded and expressed as a plot ( $n = 6$ ). Statistical significance in (B and C) was calculated by the student t test. Bars represent mean  $\pm$  SEM.
