# Supplementary material for: Mitochondrial AIF loss causes metabolic reprogramming, caspase-independent cell death blockade, embryonic lethality, and perinatal hydrocephalus
Source: PubMed Central journal article supplement — Mol Metab. 2020 May 30;40:101027. doi: 10.1016/j.molmet.2020.101027 (PMC7334469; doi:10.1016/j.molmet.2020.101027), 2020-05-30
Supplement: mmc5.pdf [file mmc5.pdf]

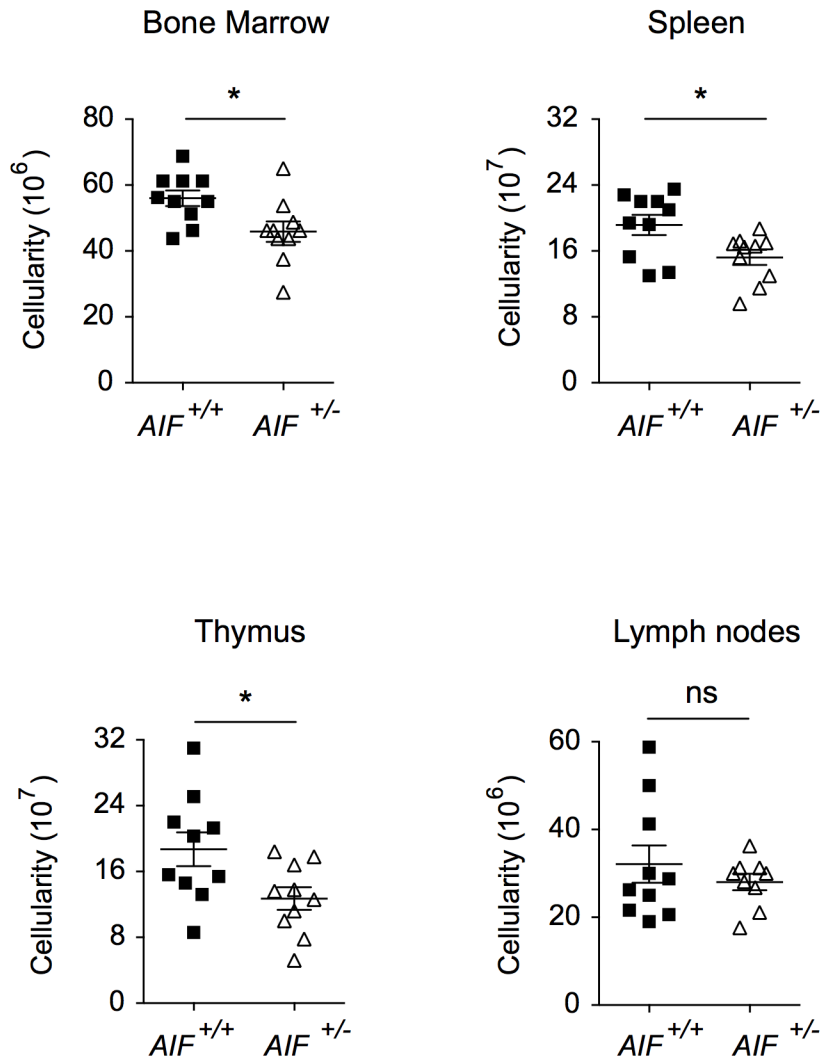

**Supplemental Figure 5.  $AIF^{-/+}$  6 month-old females displayed immune cell loss.** Assessment of cellularity in BM, spleen, thymus, and lymph nodes from 6 month-old  $AIF^{+/+}$  and  $AIF^{+/-}$  mice (n = 10 mice per group). Statistical significance was calculated by the student *t* test. Bars represent mean  $\pm$  SEM.
