# Supplementary material for: Mitochondrial AIF loss causes metabolic reprogramming, caspase-independent cell death blockade, embryonic lethality, and perinatal hydrocephalus
Source: PubMed Central journal article supplement — Mol Metab. 2020 May 30;40:101027. doi: 10.1016/j.molmet.2020.101027 (PMC7334469; doi:10.1016/j.molmet.2020.101027), 2020-05-30
Supplement: mmc6.pdf [file mmc6.pdf]

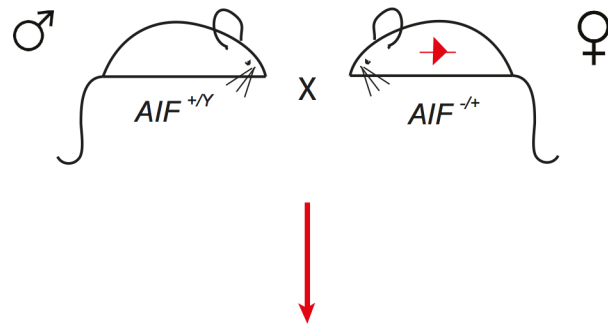

|           | Standard control diet |              | Hight fat diet |              |
|-----------|-----------------------|--------------|----------------|--------------|
|           | - Riboflavin          | + Riboflavin | - Riboflavin   | + Riboflavin |
| Total     | 56                    | 53           | 45             | 40           |
| +/+ & +/Y | 56                    | 53           | 45             | 40           |
| +/-       | 0                     | 0            | 0              | 0            |
| -/Y       | 0                     | 0            | 0              | 0            |

**Supplemental Figure 6.**  $AIF^{-/+}$  dams were unable to generate  $AIF^{+/-}$  and  $AIF^{-/Y}$  newborns.  $AIF^{+/-}$  pregnant dams were fed a standard control diet or a high-fat ketogenic diet (HFD) and supplied or not with Riboflavin in drinking water. After genetic identification, the results were reported in a table.
