# Supplementary material for: Mitochondrial AIF loss causes metabolic reprogramming, caspase-independent cell death blockade, embryonic lethality, and perinatal hydrocephalus
Source: PubMed Central journal article supplement — Mol Metab. 2020 May 30;40:101027. doi: 10.1016/j.molmet.2020.101027 (PMC7334469; doi:10.1016/j.molmet.2020.101027), 2020-05-30
Supplement: mmc7.pdf [file mmc7.pdf]

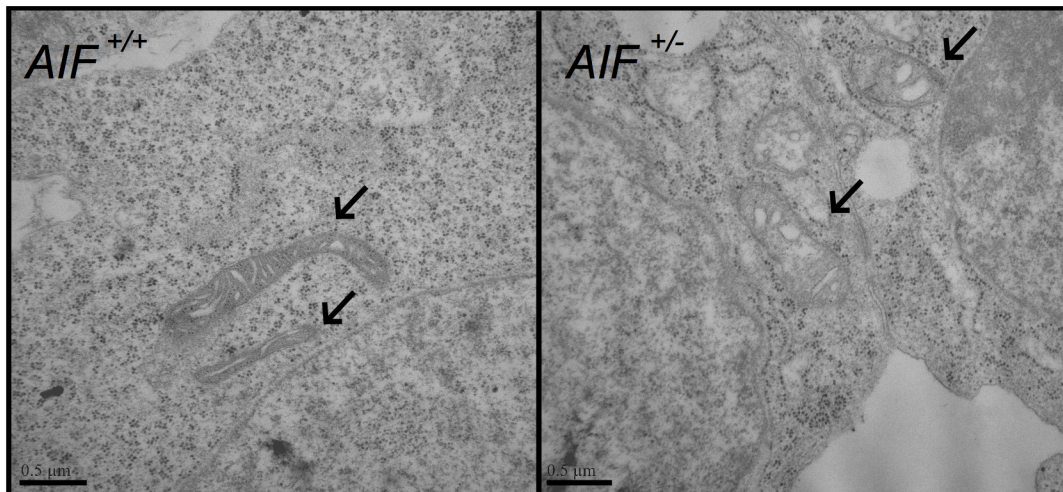

**Supplemental Figure 7.  $AIF^{+/-}$  embryos presented highly altered mitochondria.** Representative electron micrographs of E9.5  $AIF^{+/+}$  and  $AIF^{+/-}$  embryos. Representative microphotographs are shown. The black arrows mark the mitochondria. Bar: 0.5  $\mu\text{m}$ .
